# Supplementary material for: Clinical Characteristics in Early Childhood Associated with a Nevus-Prone Phenotype in Adults from Tropical Australia: Two Decades of Follow-Up of the Townsville Preschool Cohort Study
Source: MDPI journal article supplement (doi:10.3390/ijerph17228680), 2020-11-23
Supplement: s1 [file s1]

**Table S1.** Baseline characteristics of a sample of 51 cohort participants still residing in Townsville, Queensland who were re-examined for melanocytic nevi (MN) in 2016 compared to the original Townsville Preschool cohort from which they were drawn.

| Characteristic                                             | Original Cohort<br>examined twice for MN<br>as children [n = 484]<br>n (%) | Sample of cohort residing in<br>Townsville who were examined for MN<br>as children & in 2016 as adults [n = 51]<br>n (%) |
|------------------------------------------------------------|----------------------------------------------------------------------------|--------------------------------------------------------------------------------------------------------------------------|
| <b>Gender</b>                                              |                                                                            |                                                                                                                          |
| Female                                                     | 242 (50%)                                                                  | 28 (54.9%)                                                                                                               |
| Male                                                       | 242 (50%)                                                                  | 23 (45.1%)                                                                                                               |
| <b>Age at baseline (years)</b>                             |                                                                            |                                                                                                                          |
| 1                                                          | 95 (19.6%)                                                                 | 10 (19.6%)                                                                                                               |
| 2                                                          | 92 (19.0%)                                                                 | 8 (15.7%)                                                                                                                |
| 3                                                          | 92 (19.0%)                                                                 | 14 (27.5%)                                                                                                               |
| 4                                                          | 77 (15.9%)                                                                 | 8 (15.7%)                                                                                                                |
| 5                                                          | 75 (15.5%)                                                                 | 5 (9.8%)                                                                                                                 |
| 6                                                          | 53 (11.0%)                                                                 | 6 (11.8%)                                                                                                                |
| <b>Highest Maternal Education</b>                          |                                                                            |                                                                                                                          |
| Some High School                                           | 131 (27.1%)                                                                | 11 (21.6%)                                                                                                               |
| Completed Senior Schooling                                 | 242 (50.0%)                                                                | 25 (49.0%)                                                                                                               |
| Tertiary Education                                         | 111 (22.9%)                                                                | 15 (29.4%)                                                                                                               |
| <b>Eye color as child (baseline)</b>                       |                                                                            |                                                                                                                          |
| Brown                                                      | 109 (22.5%)                                                                | 15 (29.4%)                                                                                                               |
| Hazel                                                      | 110 (22.7%)                                                                | 11 (21.6%)                                                                                                               |
| Blue/green/grey                                            | 265 (54.8%)                                                                | 25 (49.0%)                                                                                                               |
| <b>Hair color as child (baseline)</b>                      |                                                                            |                                                                                                                          |
| Brown                                                      | 147 (30.4%)                                                                | 19 (37.3%)                                                                                                               |
| Blond/fair                                                 | 321 (66.3%)                                                                | 32 (62.7%)                                                                                                               |
| Red                                                        | 16 (3.3%)                                                                  | 0 (0%)                                                                                                                   |
| <b>Natural skin color (baseline)</b>                       |                                                                            |                                                                                                                          |
| Olive                                                      | 1 (0.2%)                                                                   | 1 (2.0%)                                                                                                                 |
| Medium                                                     | 104 (21.5%)                                                                | 9 (17.6%)                                                                                                                |
| Fair                                                       | 379 (78.3%)                                                                | 41 (80.4%)                                                                                                               |
| <b>Freckling as a child (baseline)</b>                     |                                                                            |                                                                                                                          |
| Absent                                                     | 236 (48.8%)                                                                | 23 (45.1%)                                                                                                               |
| Present                                                    | 248(51.2%)                                                                 | 28 (54.9%)                                                                                                               |
| <b>Solar lentigines on shoulders as a child (baseline)</b> |                                                                            |                                                                                                                          |
| Absent                                                     | 474 (97.9%)                                                                | 49 (96.1%)                                                                                                               |
| Present                                                    | 10 (2.1%)                                                                  | 2 (3.9%)                                                                                                                 |
| <b>Tanning ability as a child (baseline)<sup>1</sup></b>   |                                                                            |                                                                                                                          |

|                                               |                   |                 |
|-----------------------------------------------|-------------------|-----------------|
| Very brown & deeply tanned                    | 44 (9.2%)         | 5 (10.0%)       |
| Moderately tanned                             | 289 (60.3%)       | 31 (62.0%)      |
| Slightly tanned                               | 52 (10.9%)        | 7 (14%)         |
| Not suntanned at all                          | 94 (19.6%)        | 7 (14%)         |
| <b>MN count at baseline</b>                   |                   |                 |
| Mean $\pm$ SD                                 | 40.5 $\pm$ 34.0   | 38.3 $\pm$ 34.7 |
| Median [IQR]                                  | 34 [13.25, 58.75] | 32 [13, 55]     |
| <b>MN 5 + mm as a child (baseline)</b>        |                   |                 |
| Absent                                        | 422 (87.2%)       | 44 (86.3%)      |
| Present                                       | 62 (12.8%)        | 7 (13.7%)       |
| <b>MN 3 + mm as a child (baseline)</b>        |                   |                 |
| Absent                                        | 225 (46.5%)       | 24 (47.1%)      |
| Present                                       | 259 (52.9%)       | 27 (52.9%)      |
| <b>Sunburnt before 7 years-old (baseline)</b> |                   |                 |
| No                                            | 189 (39.0%)       | 20 (39.2)       |
| Yes                                           | 295 (61.0%)       | 31 (60.8)       |

1 missing questionnaire data for n = 5 participants in the original cohort and n = 1 participant in the 2016 follow-up sample.

**Table S2.** Distribution of incident and prevalent melanocytic nevi (MN) shown by age at follow-up in 2016.

| Age                   | n (%)     | Incident MN Count           | Total MN Count (Prevalent MN) | MN $\geq 2$ mm (Prevalent MN) | MN $\geq 5$ mm (Large Prevalent MN) |
|-----------------------|-----------|-----------------------------|-------------------------------|-------------------------------|-------------------------------------|
| <b>21 years</b>       | 5 (9.8)   |                             |                               |                               |                                     |
| Mean $\pm$ SD (Range) |           | 155.8 $\pm$ 86.7 (40-258)   | 178.8 $\pm$ 88.1 (46-274)     | 108 $\pm$ 72 (13-209)         | 1.8 $\pm$ 1.6 (0-4)                 |
| Median [IQR]          |           | 148 [76, 239.5]             | 169 [104.5, 258]              | 113 [44.5, 169]               | 1 [0.5, 3.5]                        |
| <b>25 years</b>       | 5 (9.8)   |                             |                               |                               |                                     |
| Mean $\pm$ SD (Range) |           | 227.6 $\pm$ 65.9 (181-342)  | 232.2 $\pm$ 70.1 (184-354)    | 70.4 $\pm$ 42.3 (33-127)      | 2.8 $\pm$ 4.7 (0-11)                |
| Median [IQR]          |           | 214 [183, 279]              | 216 [185, 287.5]              | 48 [36.5, 115.5]              | 1 [0, 6.5]                          |
| <b>26 years</b>       | 6 (11.8)  |                             |                               |                               |                                     |
| Mean $\pm$ SD (Range) |           | 136.8 $\pm$ 89.0 (54-240)   | 232.2 $\pm$ 70.1 (184-354)    | 27.8 $\pm$ 19.2 (4-56)        | 2.2 $\pm$ 3.5 (0-9)                 |
| Median [IQR]          |           | 111 [54.25, 240]            | 125 [59.75, 253.25]           | 29.5 [7.75, 43.25]            | 0.5 [0, 4.5]                        |
| <b>27 years</b>       | 10 (19.6) |                             |                               |                               |                                     |
| Mean $\pm$ SD (Range) |           | 182.7 $\pm$ 98.3 (40-331)   | 204.4 $\pm$ 104.5 (46-347)    | 62.4 $\pm$ 59.7 (11-222)      | 4.5 $\pm$ 6.9 (0-21)                |
| Median [IQR]          |           | 172 [105.25, 268]           | 205 [118.25, 291.5]           | 45.5 [30.5, 72]               | 1 [0, 9.25]                         |
| <b>28 years</b>       | 9 (17.6)  |                             |                               |                               |                                     |
| Mean $\pm$ SD (Range) |           | 362.2 $\pm$ 192.8 (106-706) | 410.7 $\pm$ 206.3 (141-753)   | 127 $\pm$ 76.9 (37-259)       | 2 $\pm$ 2.1 (0-5)                   |
| Median [IQR]          |           | 424 [188, 477]              | 479 [207, 544.5]              | 112 [62.5, 203]               | 2 [0, 4]                            |
| <b>29 years</b>       | 6 (11.8)  |                             |                               |                               |                                     |
| Mean $\pm$ SD (Range) |           | 279.2 $\pm$ 242.6 (86-668)  | 350.7 $\pm$ 291.5 (122-849)   | 145.5 $\pm$ 167.1 (32-481)    | 7.2 $\pm$ 14.2 (0-12)               |

|                   |                        |                        |                      |                  |
|-------------------|------------------------|------------------------|----------------------|------------------|
| Median [IQR]      | 164 [95.75, 538.25]    | 201 [156.5, 635.25]    | 87 [55.25, 212.5]    | 1.5 [0, 12]      |
| <b>≥30 years</b>  | 10 (19.6)              |                        |                      |                  |
| Mean ± SD (Range) | 227 ± 172.2 (63-565)   | 293.6 ± 192.8 (98-686) | 61.7 ± 43.4 (21-176) | 1.4 ± 1.9 (0-6)  |
| Median [IQR]      | 159 [85.8, 351.5]      | 227 [135.25, 412.75]   | 49.5 [39.25, 68.5]   | 1 [0, 2.25]      |
| <b>Total</b>      | <b>51 (100)</b>        |                        |                      |                  |
| Mean ± SD (Range) | 230.8 ± 161.7 (40-706) | 269 ± 184.2 (46-849)   | 84.6 ± 82.1 (4-481)  | 3.1 ± 6.1 (0-36) |
| Median [IQR]      | 185 [107, 289]         | 216 [145, 347]         | 61 [36, 112]         | 1 [0, 3]         |

MN: Melanocytic nevi; IQR: Inter-Quartile Range; SD: Standard Deviation.
